# Supplementary material for: Facile shape-controlled growth of hierarchical mesoporous δ-MnO2for the development of asymmetric supercapacitors
Source: Royal Society of Chemistry journal article supplement (doi:10.1039/c6ta01879c), 2016-01-01
Supplement: c6ta01879c1.pdf [file c6ta01879c1.pdf]

*Supporting Information*

**Facile Shape-Controlled Growth of Hierarchical Mesoporous  $\delta$ -MnO<sub>2</sub> for  
the Development of Asymmetric Supercapacitor**

Sourav Bag and C. Retna Raj\*

Functional Materials and Electrochemistry Laboratory,  
Department of Chemistry,  
Indian Institute of Technology Kharagpur,  
Kharagpur 721302, India.  
E-mail: crraj@chem.iitkgp.ernet.in;  
Fax: +91 3222-282252; Tel: +91 3222-283348

## Figure S1

Digital images acquired at different time interval of the reaction between HBr and  $\text{KMnO}_4$  (molar ratio 5:1). (a) Before the addition of HBr, (b,c) after the addition: at 1 (b) and 2 h (c) of the reaction. (d) Digital image of the reaction mixture (10:1 molar ratio) after 2 h of the reaction.

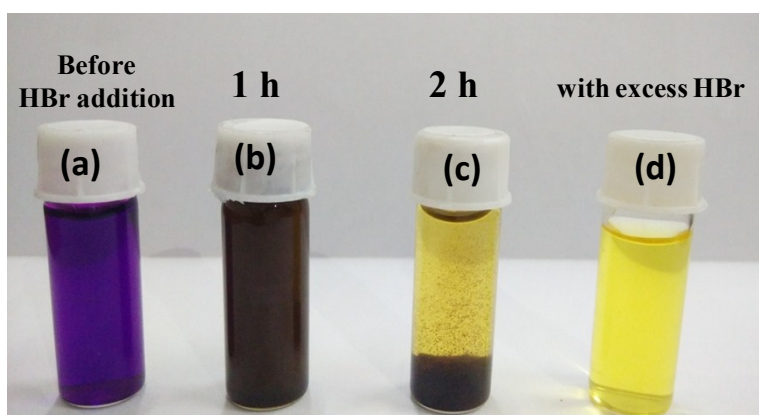

The digital image of the reaction mixture after 2 h shows the completion of the reaction. The yellow color of the supernatant is due to the  $\text{Br}_2$  evolution due to oxidation of  $\text{Br}^-$ . In presence of excess  $\text{Br}^-$  the as-produced  $\text{MnO}_2$  is completely reduced to  $\text{Mn}^{2+}$ .

**Figure S2**

UV-vis spectra of (a)  $\text{KMnO}_4$  solution, (b)  $\text{Br}_2$  water, (c)  $\text{Mn}^{2+}$  in water and (d) supernatant solution obtained after the reaction in 5:1 molar ratio.

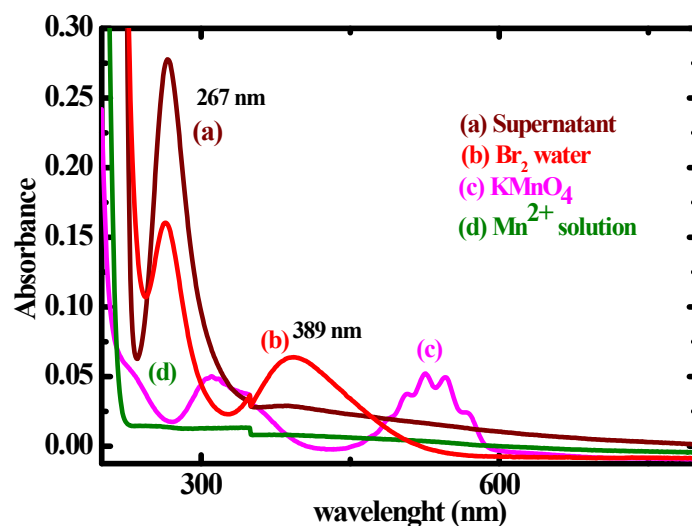

The UV-vis spectrum of supernatant shows negative test for  $\text{MnO}_4^-$ , suggesting complete reaction of  $\text{KMnO}_4$  with  $\text{HBr}$ ; the supernatant after completion of the reaction exhibit two peaks at 267 and 389 nm corresponding to  $\text{Br}_2$  in water.

**Figure S3**

TEM (A, B) and HRTEM (C) images of  $\text{MnO}_2$  obtained at 1:1 molar ratio of  $\text{KMnO}_4$  and  $\text{HBr}$ .

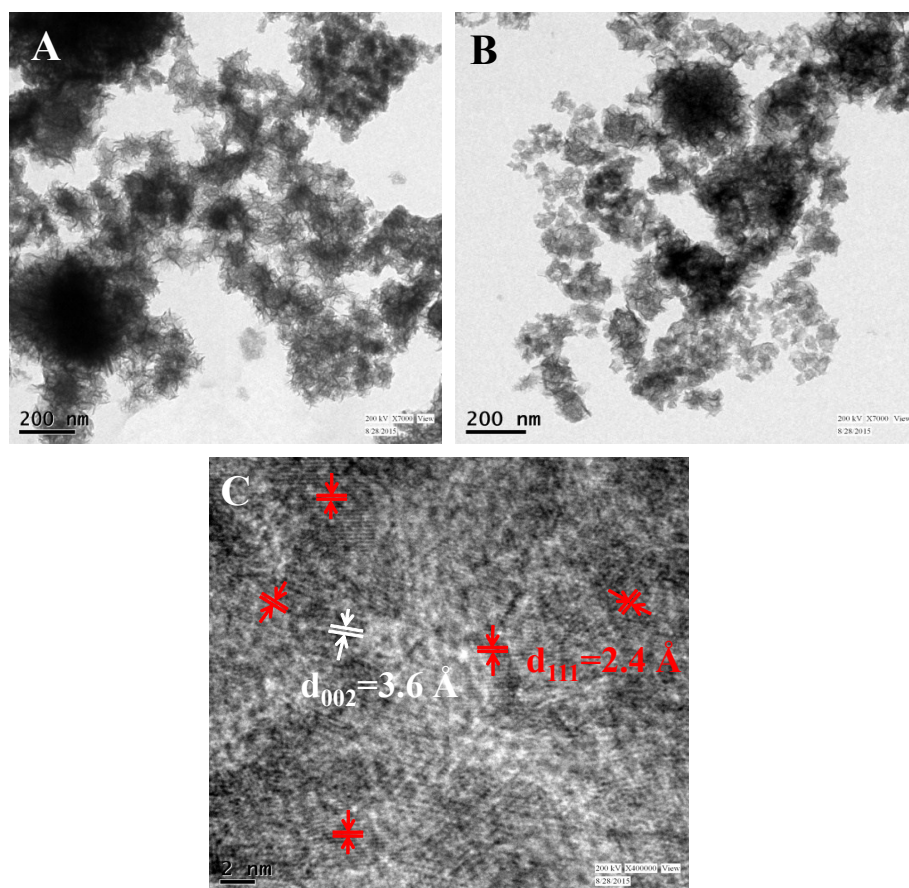

**Figure S4**

TEM (A, B) and HRTEM (C) images of  $\text{MnO}_2$  obtained at the molar ratio of 3:1 HBr and  $\text{KMnO}_4$ .

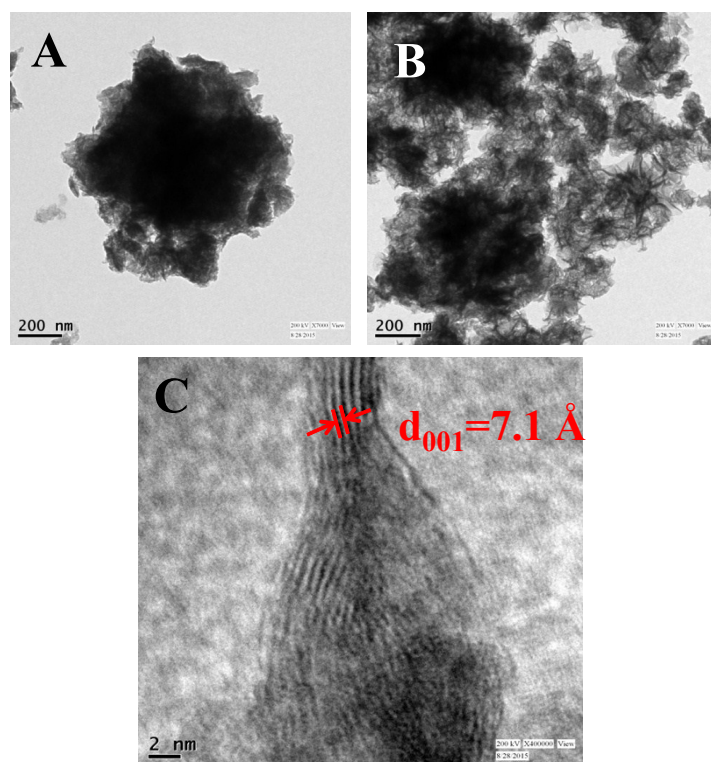

**Figure S5**

HRTEM images of as-synthesized mesoporous hierarchical  $\delta$ -MnO<sub>2</sub> nanostructure (obtained at 5:1 molar ratio).

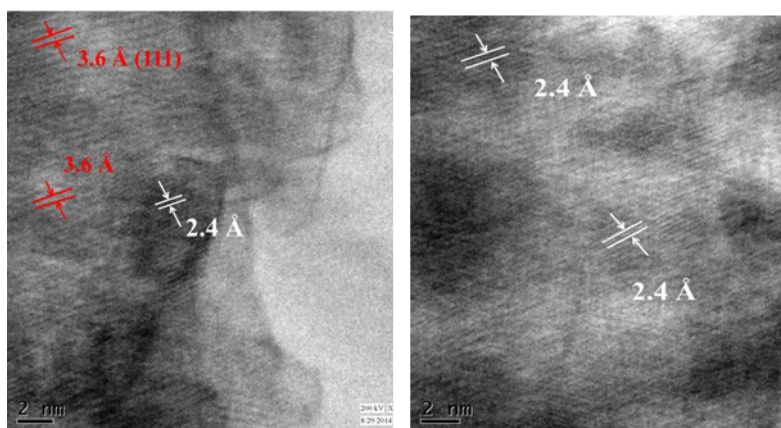

**Figure S6**

Rate capability of the  $\delta$ -MnO<sub>2</sub> electrode in 1 M LiClO<sub>4</sub> electrolyte.

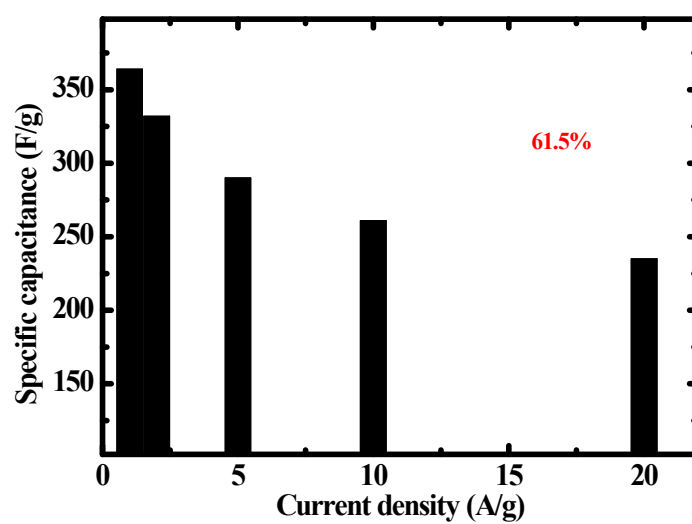

**Figure S7**

Cyclic voltammogram of mesoporous  $\delta$ -MnO<sub>2</sub> in 1 M LiClO<sub>4</sub>, Li<sub>2</sub>SO<sub>4</sub>, and LiNO<sub>3</sub> electrolytes at different scan rate (in three electrode system).

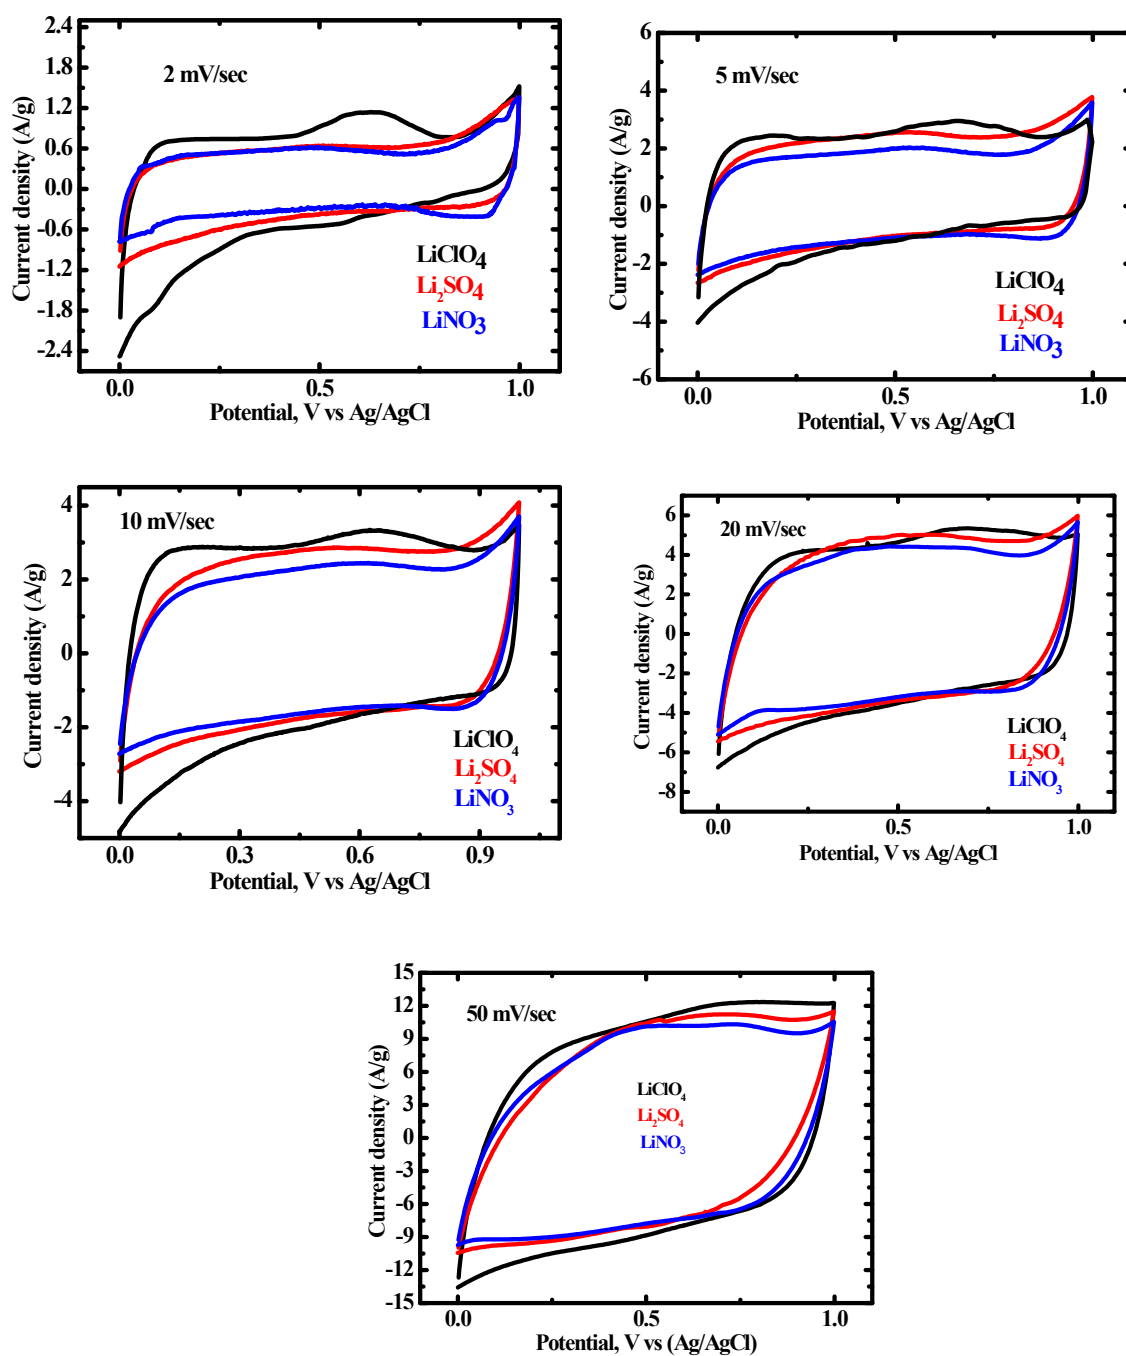

**Figure S8**

Cyclic voltammetric profile of mesoporous  $\delta$ -MnO<sub>2</sub> in 1 M NaClO<sub>4</sub>, Na<sub>2</sub>SO<sub>4</sub>, and NaNO<sub>3</sub> electrolytes at different scan rate (in three electrode system).

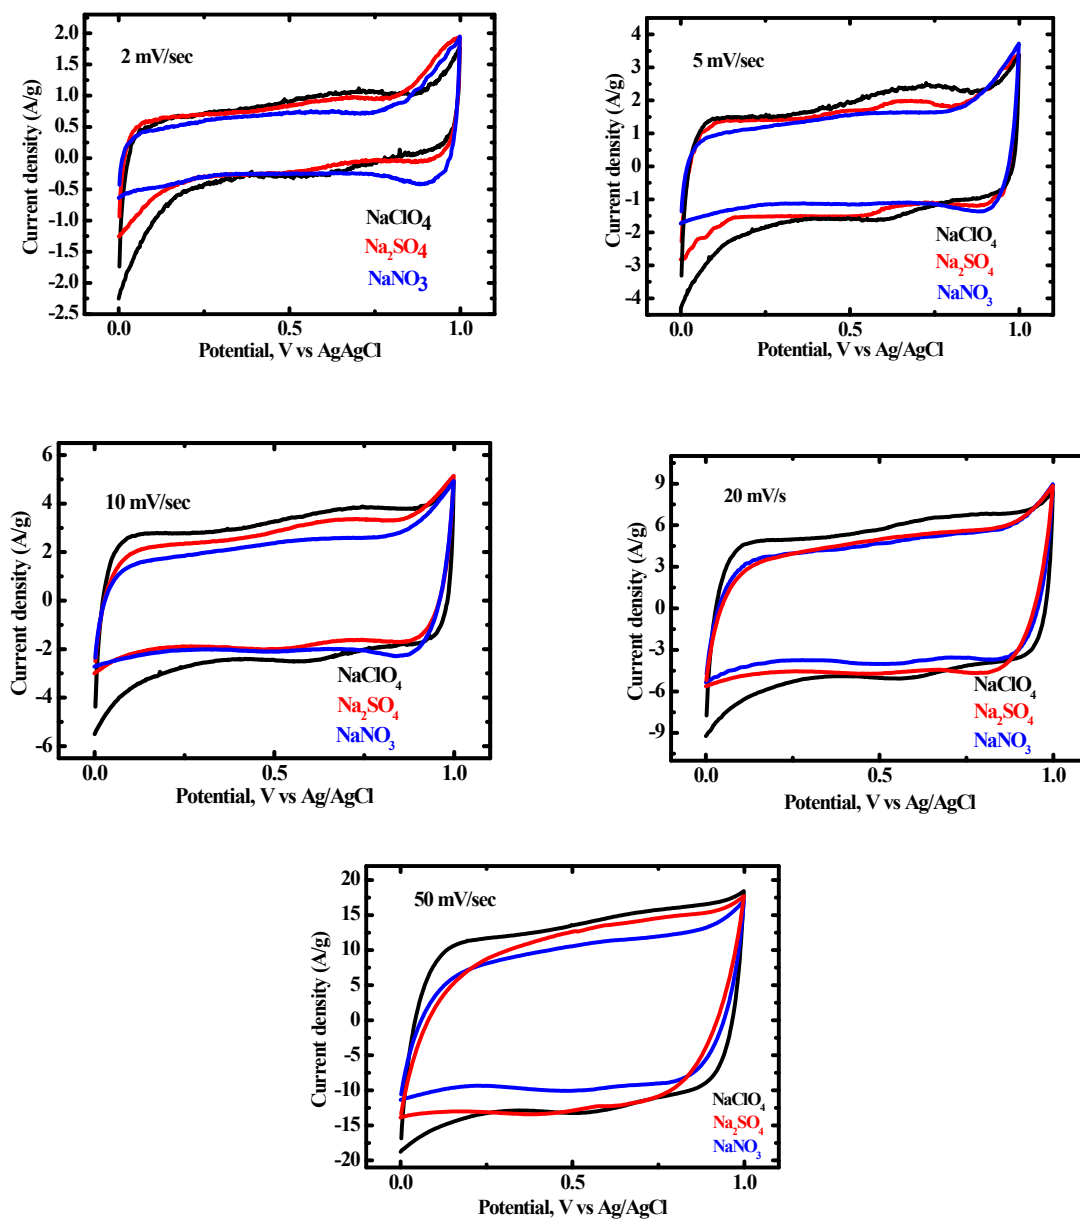

**Figure S9**

Charge-discharge profile of the mesoporous  $\delta$ -MnO<sub>2</sub> in different electrolytes.

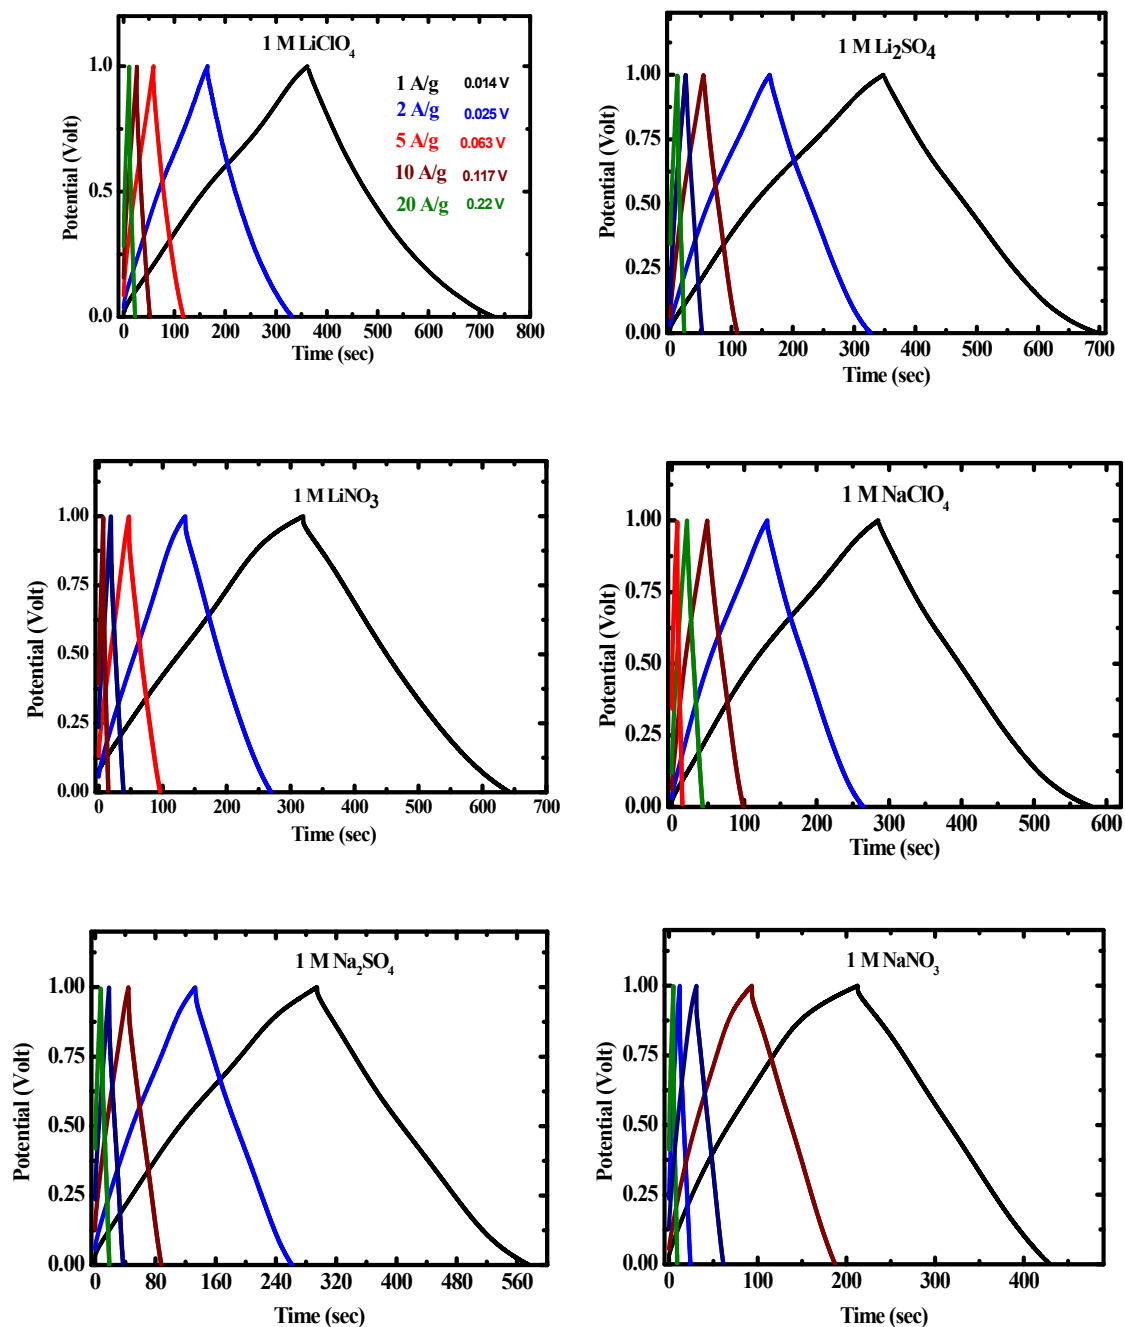

**Figure S10**

Plot illustrating the cycling stability of various  $\text{MnO}_2$  nanostructures: (a) nanoseed, (b) urchin-like (c) 3D hierarchical nanostructures. The specific capacitance was obtained at the current density of 10 A/g in three electrode system. Electrolyte: 1 M aqueous  $\text{LiClO}_4$ .

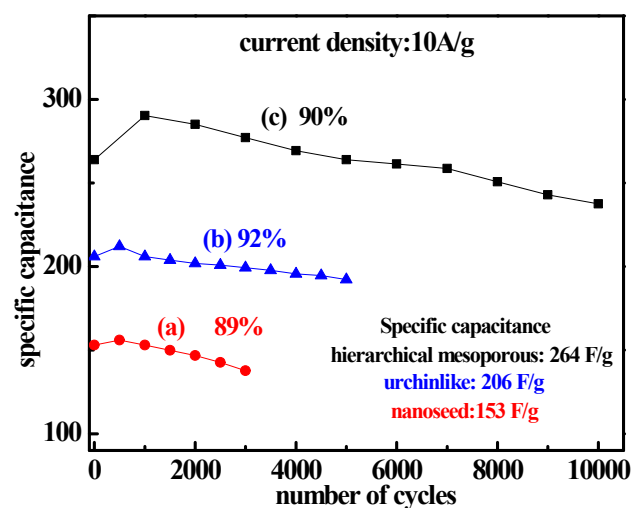

**Figure S11**

Equivalent circuit used to fit the impedance data before and after 10000 consecutive charge-discharge cycles.

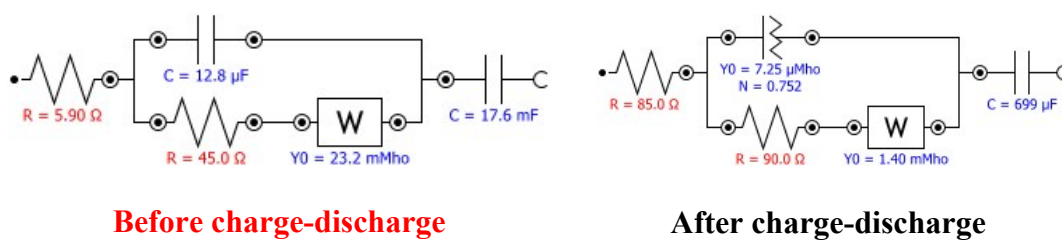

**Figure S12**

Cyclic voltammogram of activated carbon and mesoporous hierarchical  $\delta$ -MnO<sub>2</sub> nanostructure in three-electrode system at a scan rate of 100 mV/sec.

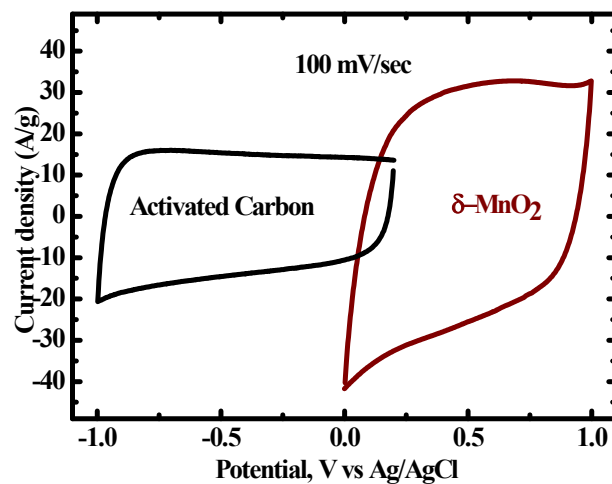

The electrodes for the asymmetric supercapacitor device were prepared by following the same procedure as the three-electrode cell experiments. The electroactive material loading on each electrode was controlled by maintaining the charge balance of the two electrodes. The charge accumulated in the cathode ( $Q_c$ ) should be equal to the anodic charge ( $Q_a$ ).

To maintain the equal charge balance,  $Q_c = Q_a$ ,

$$m_c C_{sc} \Delta V_c = m_a C_{sa} \Delta V_a$$

where  $m_c$  and  $m_a$  are the mass of electrode material in the cathode and anode, respectively.  $C_s$  is the specific capacitance of the electrode material.  $\Delta V$  is the potential window for charge discharge of the corresponding electrode material in three electrode system.

Here,  $\Delta V_a = \Delta V_c = 1 \text{ V}$

$$m_c/m_a = C_{sa}/C_{sc}$$

The mass of the active material ( $m_c$ ) loaded on the Ni foam was  $\sim 1 \text{ mg}$ . The specific capacitance of the  $\delta$ -MnO<sub>2</sub> is 362 F/g and the activated carbon is 132 F/g. The amount of

activated carbon taken for the anode is 2.75 mg. The two electrodes were kept in split cell and a filter paper soaked in  $\text{LiClO}_4$  (1 M) electrolyte was placed between two electrodes.

**Figure S13**

Nyquist plot and corresponding equivalent circuit obtained with ASC.

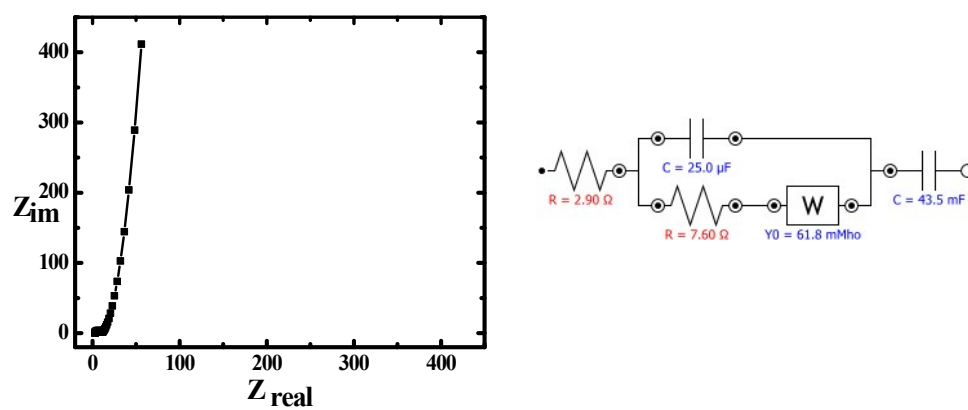

**Table S1**Summary of the recent literature on the synthesis of  $\delta$ -MnO<sub>2</sub>

| Article                                                  | Synthetic strategy                                                                                                                                                                                                                                        | Surface area                                                          |
|----------------------------------------------------------|-----------------------------------------------------------------------------------------------------------------------------------------------------------------------------------------------------------------------------------------------------------|-----------------------------------------------------------------------|
| <i>Electrochim. Acta</i> 2014, <b>116</b> , 188          | KMnO <sub>4</sub> and thiophene kept in dichloromethane solution and stirred for 24 h at 4°C                                                                                                                                                              | 226 m <sup>2</sup> g <sup>-1</sup>                                    |
| <i>Electrochim. Acta</i> 2014, <b>127</b> 410            | KMnO <sub>4</sub> solution having pH ~ 2 was poured into a beaker with the organic solution of dichloromethane and thiophene. The mixed solution was kept at 4°C for 24 h.                                                                                | 237 m <sup>2</sup> g <sup>-1</sup>                                    |
| <i>J. Power Sources</i> 2012, <b>198</b> , 428           | KMnO <sub>4</sub> and MnSO <sub>4</sub> ·H <sub>2</sub> O (molar ratio is 2:3) are dissolved in water and stirred to form a homogeneous solution, and then the mixture solution is transferred into a Teflon -lined autoclave assembled in microwave oven | 213.6 m <sup>2</sup> g <sup>-1</sup>                                  |
| <i>ACS Appl. Mater. Interfaces</i> 2009, <b>1</b> , 1130 | KMnO <sub>4</sub> and NaOH in water mixed with aqueous solution of MnCl <sub>2</sub> ·4H <sub>2</sub> O in 400 mL of water.                                                                                                                               | 45 m <sup>2</sup> g <sup>-1</sup>                                     |
| <i>J. Mater. Chem.</i> , 2010, <b>20</b> , 390           | 30 mg of disordered mesoporous carbon were mixed with 10 mL of aqueous KMnO <sub>4</sub> solution of known concentration ranging from 0.001 M to 0.1 M and mixed for 5 min.                                                                               | 186 m <sup>2</sup> g <sup>-1</sup><br>(with 30% of MnO <sub>2</sub> ) |
| <i>Ind. Eng. Chem. Res.</i> 2013, <b>52</b> , 9586       | NaOH/MnCl <sub>2</sub> reflux                                                                                                                                                                                                                             | 49.11 m <sup>2</sup> g <sup>-1</sup>                                  |
| <i>J. Phys. Chem. C</i> 2008, <b>112</b> , 7270          | oxidation of the Mn(OH) <sub>2</sub> by potassium persulfate K <sub>2</sub> S <sub>2</sub> O <sub>8</sub>                                                                                                                                                 | 20 m <sup>2</sup> g <sup>-1</sup>                                     |
| <i>Sci. Rep.</i> 2014, <b>4</b> , 3878                   | Reducing KMnO <sub>4</sub> in autoclave, polycarbonate template.                                                                                                                                                                                          | 85.2 m <sup>2</sup> g <sup>-1</sup>                                   |
| <i>J. Phys. Chem. B</i> , 2001, <b>105</b> , 8712        | Fumaric acid is added to a solution of NaMnO <sub>4</sub> in a 1:3 molar ratio. Product obtained through gelation takes 24 h                                                                                                                              | 220 m <sup>2</sup> g <sup>-1</sup>                                    |
| <i>J. Mater. Chem.</i> , 2012, <b>22</b> , 153           | Graphitic nanorod by CVD + KMnO <sub>4</sub> (64% MnO <sub>2</sub> )                                                                                                                                                                                      | 113 m <sup>2</sup> g <sup>-1</sup>                                    |
| <i>Mater. Lett.</i> 2010, <b>64</b> , 1763               | KMnO <sub>4</sub> and urea reacted for 24 h at 90°C                                                                                                                                                                                                       | 230 m <sup>2</sup> g <sup>-1</sup>                                    |
| <i>J. Phys. Chem. C</i> , 2007, <b>111</b> , 18033       | KMnO <sub>4</sub> reduction by oleic acid for 10 h at 60 °C                                                                                                                                                                                               | 70.70 m <sup>2</sup> g <sup>-1</sup>                                  |

|                  |                                                                 |                                |
|------------------|-----------------------------------------------------------------|--------------------------------|
| <i>This work</i> | Room temperature reduction of $\text{KMnO}_4$ by HBr within 2 h | $238 \text{ m}^2\text{g}^{-1}$ |
|------------------|-----------------------------------------------------------------|--------------------------------|

**Table S2**

Specific capacitance of mesoporous  $\delta$ -MnO<sub>2</sub> in different electrolytic solution at different current density.

| Electrolyte                     | Capacitance value (F/g) |       |       |        |        |
|---------------------------------|-------------------------|-------|-------|--------|--------|
|                                 | 1 A/g                   | 2 A/g | 5 A/g | 10 A/g | 20 A/g |
| LiClO <sub>4</sub>              | 364                     | 332   | 290   | 261    | 235    |
| Li <sub>2</sub> SO <sub>4</sub> | 348                     | 326   | 270   | 248    | 226    |
| LiNO <sub>3</sub>               | 321                     | 266   | 240   | 208    | 170    |
| NaClO <sub>4</sub>              | 288                     | 264   | 242   | 200    | 182    |
| Na <sub>2</sub> SO <sub>4</sub> | 282                     | 254   | 220   | 190    | 180    |
| NaNO <sub>3</sub>               | 214                     | 186   | 155   | 140    | 120    |
